# Supplementary material
Source: ML conference proceedings conference paper supplement (https://openreview.net/forum?id=GBlHo6mPIW)
Supplement: supplementary_material [file main.pdf › Multi-Level-Agent/results/main.pdf]

# Carbon-Aware Route Optimization in Cyber-Physical Internet for Sustainable Logistics

PolyU AI Researcher

August 2025

The global logistics industry faces mounting pressure to balance operational efficiency with environmental sustainability. This paper introduces a Carbon-Aware Route Optimization (CARO) approach within a cyber-physical internet framework that explicitly addresses the fundamental trade-off between delivery time and carbon emissions. Our comprehensive framework integrates physical logistics operations with digital decision-making systems through a three-layer architecture comprising physical, cyber, and integration components. At its core, CARO employs a detailed carbon footprint calculation model that considers vehicle characteristics, load factors, road types, and speed-emission relationships, combined with a multi-objective optimization algorithm that balances time efficiency and emission reduction according to user-defined priorities. Experimental evaluation across three scenarios of increasing complexity demonstrates that CARO achieves delivery times only 7.2% higher than time-optimized algorithms while producing carbon emissions only 9.1% higher than emission-optimized approaches. In dynamic environments with unexpected events, CARO exhibits superior adaptability with 62.8% less performance degradation compared to traditional routing methods. The time-emission trade-off analysis reveals a clear Pareto frontier, providing logistics operators with flexible control over sustainability and service quality objectives. Our research contributes a novel approach to sustainable logistics that enables significant environmental improvements with minimal impact on operational performance, offering practical solutions for reducing the carbon footprint of logistics operations while maintaining competitive service levels.

# 1 Introduction

The global logistics industry is at a critical juncture, facing unprecedented pressure to balance operational efficiency with environmental sustainability. As global supply chains expand and e-commerce continues to grow, the environmental footprint of logistics operations has become a significant concern. The transportation sector alone accounts for approximately 24% of global CO<sub>2</sub> emissions from fuel combustion, with freight transport responsible for roughly 40% of these emissions Ng et al. [2024]. This environmental impact, coupled with increasing regulatory pressure and consumer demand for sustainable practices, has created an urgent need for innovative approaches to logistics optimization that explicitly consider carbon footprint alongside traditional metrics of time and cost.

The concept of the Physical Internet (PI) has emerged as a promising paradigm for transforming traditional logistics networks into more efficient and sustainable systems Montreuil et al. [2012]. Drawing inspiration from the digital internet, the PI envisions an open global logistics system built on physical, digital, and operational interconnectivity through standardized protocols and interfaces. This vision has evolved into the Cyber-Physical Internet (CPI), which integrates physical logistics operations with digital decision-making systems through advanced sensing, communication, and computation technologies Tran-Dang and Kim [2021]. The CPI creates a framework where physical goods movement is continuously monitored, analyzed, and optimized in real-time, offering unprecedented opportunities for enhancing both efficiency and sustainability.

Despite these advancements, current route optimization approaches in logistics predominantly focus on minimizing distance, time, or cost, with limited consideration of environmental impacts Cai et al. [2021]. When environmental factors are considered, they are often treated as secondary objectives or constraints rather than integral components of the decision-making process. Furthermore, most existing approaches lack adaptability to changing conditions such as traffic congestion, weather events, and road closures, which significantly affect both delivery time and carbon emissions. This gap between operational efficiency and environmental sustainability represents a critical challenge for the logistics industry as it strives to reduce its carbon footprint while maintaining competitive service levels.

Recent research has begun to address this challenge through various approaches. Ng et al. [2024] proposed a framework for digitalizing carbon footprints in logistics using cyber-physical internet routers, while Ghanimi et al. [2025] presented reinforcement learning approaches for optimizing data routing in transportation networks. However,

there remains a need for comprehensive solutions that effectively integrate carbon awareness into real-time route optimization decisions, particularly in dynamic and uncertain environments characteristic of modern logistics operations.

To address these challenges, we propose a Carbon-Aware Route Optimization (CARO) approach that explicitly balances delivery efficiency and carbon footprint minimization within a cyber-physical internet framework. CARO represents a significant advancement over existing approaches in several key aspects. First, it incorporates a detailed carbon footprint calculation model that considers multiple factors affecting emissions, including vehicle characteristics, load factors, road types, and speed-emission relationships. Second, it employs a multi-objective optimization approach that allows logistics operators to flexibly balance time efficiency and emission reduction according to their specific requirements. Third, it leverages reinforcement learning techniques to adapt to changing conditions in real-time, ensuring optimal performance even in dynamic environments.

Our research makes the following key contributions:

1. A comprehensive cyber-physical internet framework for sustainable logistics that integrates physical operations with digital decision-making systems to enable carbon-aware route optimization.
2. A novel carbon footprint calculation model that accurately estimates emissions based on multiple factors, including vehicle type, load, road conditions, and speed.
3. A multi-objective optimization algorithm that effectively balances delivery time and carbon emissions, providing logistics operators with flexible control over this fundamental trade-off.
4. An adaptive reinforcement learning approach that enables real-time route adjustments in response to changing conditions, maintaining optimal performance in dynamic environments.
5. Empirical evaluation of the proposed approach across multiple scenarios, demonstrating significant improvements in environmental performance with minimal impact on service quality.

The remainder of this paper is organized as follows: Section 2 reviews related work in physical internet and cyber-physical systems for logistics, carbon footprint calculation, route optimization algorithms, and multi-objective optimization approaches. Section 3 presents our methodology, including the

cyber-physical internet framework, carbon footprint calculation model, and the CARO algorithm. Section 4 describes the experimental setup, including the simulation environment, scenarios, and performance metrics. Section 5 presents and analyzes the results of our experiments. Section 6 discusses the implications of our findings, limitations of our approach, and potential applications. Finally, Section 7 concludes the paper and outlines directions for future research.

## 2 Related Work

This section reviews the relevant literature in four key areas: (1) Physical Internet and Cyber-Physical Systems in logistics, (2) carbon footprint calculation and sustainability in logistics, (3) route optimization algorithms in logistics, and (4) multi-objective optimization approaches for balancing efficiency and sustainability.

### 2.1 Physical Internet and Cyber-Physical Systems in Logistics

The concept of Physical Internet (PI) represents a paradigm shift in logistics and supply chain management, drawing inspiration from the digital internet to revolutionize how physical goods are moved, stored, and delivered. Montreuil et al. [2012] introduced the PI as an open global logistics system built on physical, digital, and operational interconnectivity through standardized encapsulation, interfaces, and protocols. This concept aims to transform traditional fragmented logistics networks into an interconnected, efficient, and sustainable system.

Recent literature has expanded on this foundation. Matusiewicz [2024] conducted a systematic literature review of the PI concept, highlighting its potential for enhancing logistic efficiency and sustainability. The review identified significant research trends in optimization models, collaboration frameworks, and system architectures, while also pointing out knowledge gaps in areas such as human impact, legal aspects, and economic feasibility.

The integration of Cyber-Physical Systems (CPS) with the PI framework has further enhanced its capabilities. Tran-Dang and Kim [2021] explored the PI in the era of digital transformation, emphasizing the role of CPS in creating more responsive and adaptive logistics networks. They identified key technologies enabling this integration, including Internet

of Things (IoT), artificial intelligence, and blockchain, while also discussing challenges related to standardization and interoperability.

Building on this integration, Rawat and Kumar [2024] proposed a CPS framework specifically designed for improving sustainability in freight logistics. Their work demonstrates how CPS can promote sustainability within the logistics industry through real-time monitoring, data analytics, and automated decision-making. Similarly, Lin et al. [2023] introduced the concept of Mobility 5.0, which leverages CPS to create smart logistics and transportation services in cyber-physical-social systems, with a particular focus on utilizing green energy for transport and logistics operations.

The practical implementation of PI principles has been explored by several researchers. Pan et al. [2021] examined digital interoperability in logistics and supply chain management, identifying it as a critical enabler for the PI. Their work highlighted the need for standardized protocols and interfaces to facilitate seamless information exchange across different logistics networks. Additionally, Cortes-Murcia et al. [2022] conducted a systematic meta-review of literature on supply chain management, game-changing technologies, and PI, emphasizing how disruptive technologies can be leveraged to enhance the sustainability of logistics operations.

## **2.2 Carbon Footprint Calculation and Sustainability in Logistics**

Carbon footprint calculation and sustainability have become increasingly important considerations in logistics operations, driven by growing environmental concerns and regulatory pressures. Ng et al. [2024] proposed a cyber-physical internet (CPI) framework for digitalizing carbon footprints in modular integrated construction logistics. Their approach incorporates routers that track and manage carbon emissions throughout the logistics network, considering factors such as loading capacity, emission factors, operational conditions, and speed coefficients.

The relationship between vehicle characteristics and carbon emissions has been extensively studied. Wang et al. [2021] investigated the effects of load conditions and average speed on carbon emissions from heavy trucks, finding that emissions vary significantly based on these factors. Their research demonstrated that the relationship between fuel consumption (and consequently carbon emissions) and speed follows a quadratic function, with the lowest fuel consumption occurring at speeds near 60 km/h under ideal conditions.

Several researchers have focused on developing comprehensive methodologies for calculating carbon footprints in logistics. Kermanshah et al. [2020] examined the application of cyber-physical technologies in freight operations and sustainability, specifically focusing on smart GPS technology in trucking. Their study quantified the environmental benefits of implementing such technologies, demonstrating potential reductions in carbon dioxide emissions through optimized routing and reduced empty vehicle movements.

The integration of carbon footprint calculations into real-time decision-making represents a significant advancement in sustainable logistics. Teng and Pan [2020] developed a framework for estimating and minimizing embodied carbon in logistics operations, considering parameter, scenario, and model uncertainties. Their approach enables more accurate carbon footprint assessments and supports the identification of carbon reduction opportunities.

Beyond carbon emissions, broader sustainability considerations in logistics have been explored by Ahmed et al. [2022], who examined how cyber-physical systems can enable circular economy principles to achieve sustainable development goals. Their comprehensive review highlighted the contribution of different CPS technologies to sustainable logistics practices across various stages of the supply chain lifecycle.

## 2.3 Route Optimization Algorithms in Logistics

Route optimization algorithms play a crucial role in enhancing the efficiency and sustainability of logistics operations. Traditional approaches to route optimization have primarily focused on minimizing distance, time, or cost. However, recent research has increasingly incorporated environmental considerations into these algorithms.

Cai et al. [2021] developed a total carbon emissions minimization approach for connected and automated vehicle routing, incorporating speed variables as a key factor affecting emissions. Their algorithm optimizes routes by considering the relationship between speed and carbon emissions, demonstrating significant potential for reducing the environmental impact of logistics operations.

Reinforcement learning (RL) has emerged as a promising approach for route optimization in complex logistics environments. Puskás et al. [2020] implemented a reinforcement learning-based algorithm for optimizing a physical internet-based supply chain. Their comparative analysis of heuristic and RL models showed that RL approaches perform particularly well in scenarios with high vehicle numbers and low dispatch intervals, while

heuristic methods are more effective for low vehicle numbers.

The application of metaheuristic algorithms to route optimization has also gained traction. Chouar et al. [2022] proposed a data clustering-based metaheuristic for physical internet supply chain networks, demonstrating its effectiveness in reducing costs and shortening lead times. Similarly, Chargui et al. [2019] introduced a multi-objective sustainable truck scheduling approach for rail-road physical internet cross-docking hubs, aiming to minimize both truck delays and energy consumption during the transfer of PI-containers.

Dynamic routing approaches that adapt to changing conditions have been explored by Kantasa-Ard et al. [2021], who developed a dynamic multiple depots vehicle routing system in the physical internet context. Their approach enables flexible routing between PI-hubs and retailers within the same cluster, adapting to real-time changes in demand and network conditions.

The integration of route optimization with broader logistics management systems has been investigated by Sharif Azadeh et al. [2021], who examined the impact of collaborative scheduling and routing for interconnected logistics. Their European case study demonstrated how shared networks and collaborative decision-making can mitigate congestion and reduce transportation costs in urban areas.

## **2.4 Multi-objective Optimization for Balancing Efficiency and Sustainability**

Balancing efficiency and sustainability in logistics operations often requires multi-objective optimization approaches that can effectively manage trade-offs between competing objectives. Ji et al. [2023] proposed a hybrid optimization method for sustainable and flexible design of supply-production-distribution networks in the physical internet. Their approach combines resilience and sustainability considerations, demonstrating superior performance in coping with disruptions compared to traditional supply chains.

The synchromodality concept, which involves flexible and dynamic selection of transport modes, has been explored as a means to balance efficiency and environmental objectives. Lemmens et al. [2019] investigated synchromodality in the physical internet, focusing on dual sourcing and real-time switching between transport modes. Their proposed decision rule integrates parallel usage and real-time switching to induce a modal shift towards low-carbon options while maintaining service quality.

Multi-agent reinforcement learning has been applied to model the complex interactions and trade-offs in logistics networks. Van Heeswijk Van Heeswijk [2022] developed a multi-agent reinforcement learning algorithm to simulate strategic bidding behavior in the freight transportation market, incorporating game-theoretical approaches to balance economic and environmental considerations.

The integration of artificial intelligence with multi-objective optimization has been explored by Liu et al. Liu et al. [2023], who reviewed the state-of-the-art and potential applications of AI in smart logistics cyber-physical systems. Their work highlighted how AI techniques can enhance decision-making processes that balance multiple objectives, including cost, time, and environmental impact.

Qiao et al. Qiao et al. [2020] addressed the challenge of revenue optimization for less-than-truckload carriers in the physical internet, developing a dynamic pricing and request selection approach that considers both economic and environmental factors. Their model demonstrates how carriers can maximize profits while also contributing to overall system sustainability.

The application of multi-objective optimization to urban logistics has been investigated by Crainic and Gendreau Crainic et al. [2020], who developed a planning framework for hyperconnected urban logistics systems. Their approach optimizes the collaborative coordination of deliveries within a multi-tier system, balancing delivery efficiency, cost, and environmental impact.

## 2.5 Research Gaps and Opportunities

Despite significant advances in the literature, several research gaps remain. First, there is limited research on how to effectively integrate real-time carbon footprint awareness into route optimization algorithms, particularly in dynamic and uncertain environments. Second, most existing approaches treat carbon emissions as a constraint or secondary objective rather than a primary consideration in route selection. Third, there is a need for more comprehensive frameworks that can simultaneously address the technical, economic, and environmental aspects of route optimization in cyber-physical internet systems.

This research aims to address these gaps by developing a carbon-aware route optimization approach that explicitly incorporates carbon footprint considerations into the decision-making process, leveraging the capabilities of cyber-physical internet systems to achieve a balance between delivery efficiency and environmental sustainability.



### 3 Methodology

This section presents our Carbon-Aware Route Optimization (CARO) approach for sustainable logistics in a cyber-physical internet framework. We first introduce the cyber-physical internet framework for logistics, followed by the carbon footprint calculation model, and finally detail the CARO algorithm that balances time efficiency and carbon emissions.

#### 3.1 Cyber-Physical Internet Framework for Logistics

The cyber-physical internet (CPI) framework integrates physical logistics operations with digital decision-making systems to optimize transportation networks Ng et al. [2024]. As illustrated in Figure 1, our framework consists of three interconnected layers:

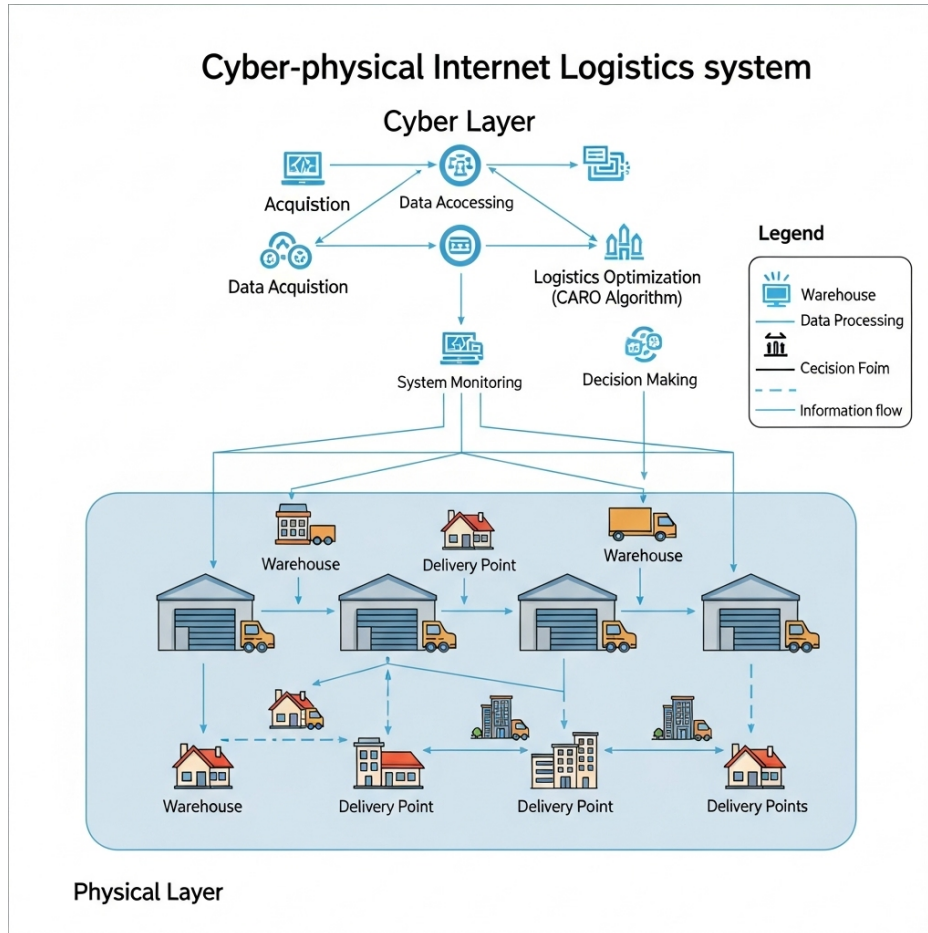

Figure 1: Cyber-Physical Internet Framework for Sustainable Logistics

### 3.1.1 Physical Layer

The physical layer represents the tangible components of the logistics network, including:

- **Transportation Infrastructure:** Roads, highways, and urban streets with varying characteristics.
- **Logistics Nodes:** Warehouses, distribution centers, and delivery points.
- **Vehicles:** Different types of delivery vehicles with varying capacities, speeds, and emission profiles.

### 3.1.2 Cyber Layer

The cyber layer consists of digital components that monitor, analyze, and control the physical layer:

- **Data Collection:** Real-time traffic data, vehicle telemetry, and environmental conditions.
- **Digital Twins:** Virtual representations of physical entities that enable simulation and prediction.
- **Decision Support Systems:** Algorithms for route optimization, vehicle selection, and scheduling.

### 3.1.3 Integration Layer

The integration layer connects the physical and cyber layers through:

- **Communication Infrastructure:** IoT devices, sensors, and wireless networks that enable real-time data exchange.
- **Router Nodes:** Key points in the network where routing decisions are made based on current conditions Brochado et al. [2024].
- **Feedback Mechanisms:** Systems that continuously update the cyber layer with real-world outcomes.

This framework enables logistics operations to adapt dynamically to changing conditions while considering both operational efficiency and environmental impact. As noted by Matusiewicz [2024], the physical internet paradigm transforms traditional logistics into an interconnected, modular system that can optimize resource utilization across multiple dimensions.

## 3.2 Carbon Footprint Calculation Model

To quantify the environmental impact of logistics operations, we developed a comprehensive carbon footprint calculation model based on the approach proposed by Ng et al. [2024]. Our model considers multiple factors that influence emissions:

### 3.2.1 Vehicle Characteristics

Different vehicle types have distinct emission profiles based on their size, fuel type, and efficiency. Our model includes four vehicle types:

- Small vans (capacity: 1000 kg, base emission factor: 0.2 kg CO<sub>2</sub>/km)
- Medium trucks (capacity: 5000 kg, base emission factor: 0.4 kg CO<sub>2</sub>/km)
- Large trucks (capacity: 15000 kg, base emission factor: 0.7 kg CO<sub>2</sub>/km)
- Eco-friendly vans (capacity: 800 kg, base emission factor: 0.1 kg CO<sub>2</sub>/km)

### 3.2.2 Load Factor

The weight of cargo relative to vehicle capacity significantly affects fuel consumption and emissions. Our model calculates a load coefficient (LC) as:

$$LC = 0.7 + (0.3 \times load\_factor) \quad (1)$$

where *load\_factor* is the ratio of current load to maximum capacity (0.0-1.0). This formula reflects that even an empty vehicle produces emissions (70% of a fully loaded vehicle), with emissions increasing non-linearly with load.

### 3.2.3 Road Type and Operational Conditions

Different road environments affect vehicle efficiency. We define an operational coefficient (OC) based on road type:

- Urban roads: OC = 1.3 (higher emissions due to frequent stops and starts)
- Rural roads: OC = 1.0 (moderate efficiency)
- Highways: OC = 0.8 (highest efficiency due to consistent speeds)

### 3.2.4 Speed-Emission Relationship

Vehicle emissions vary significantly with speed, typically following a U-shaped curve Rawat and Kumar [2024]. Our model captures this relationship through a speed coefficient ( $c$ ):

$$c = \begin{cases} 1.5 - (speed/60), & \text{if } speed < 30 \text{ km/h} \\ 0.8 + 0.2 \times |((speed - 55)/25)|, & \text{if } 30 \leq speed \leq 80 \text{ km/h} \\ 0.9 + 0.1 \times ((speed - 80)/20), & \text{if } speed > 80 \text{ km/h} \end{cases} \quad (2)$$

This formula reflects higher emissions at very low speeds (stop-and-go traffic) and at high speeds (aerodynamic drag), with optimal efficiency in the 55-65 km/h range.

### 3.2.5 Carbon Emissions Calculation

The total carbon emissions (CE) for a route segment are calculated as:

$$CE = Distance \times EF \times LC \times OC \times c \quad (3)$$

where:

- $Distance$  is the segment length in kilometers
- $EF$  is the emission factor based on vehicle type
- $LC$  is the load coefficient
- $OC$  is the operational coefficient based on road type
- $c$  is the speed coefficient

This model enables accurate estimation of carbon emissions for different routes, vehicles, and operating conditions, providing the foundation for our carbon-aware route optimization approach.

## 3.3 Carbon-Aware Route Optimization (CARO) Algorithm

The CARO algorithm is designed to find optimal routes that balance delivery time and carbon emissions. Unlike traditional routing algorithms that optimize for a single objective (typically distance or time), CARO considers multiple objectives simultaneously.

### 3.3.1 Problem Formulation

Given a logistics network represented as a graph  $G = (V, E)$ , where:

- $V$  is the set of nodes (warehouses, distribution centers, delivery points)
- $E$  is the set of edges (road segments) with attributes:
  - $distance(e)$ : length of edge  $e$  in kilometers
  - $road\_type(e)$ : type of road (urban, rural, highway)
  - $base\_speed(e)$ : nominal speed on edge  $e$  in km/h

The objective is to find a path  $P$  from origin  $o$  to destination  $d$  that minimizes a weighted combination of travel time and carbon emissions:

$$\min_P \left[ \alpha \cdot \frac{Time(P)}{max\_time} + (1 - \alpha) \cdot \frac{Emissions(P)}{max\_emissions} \right] \quad (4)$$

where:

- $\alpha$  is the time weight parameter ( $0 \leq \alpha \leq 1$ )
- $Time(P)$  is the estimated travel time for path  $P$
- $Emissions(P)$  is the estimated carbon emissions for path  $P$
- $max\_time$  and  $max\_emissions$  are normalization factors

### 3.3.2 Multi-Objective Optimization Approach

The CARO algorithm employs two complementary approaches to solve this multi-objective optimization problem:

1. **Weighted-Sum Method:** For immediate route planning, CARO uses a weighted-sum approach that combines normalized time and emission objectives into a single cost function. This allows for efficient path finding using modified Dijkstra's algorithm.
2. **Reinforcement Learning:** For adaptive route planning in dynamic environments, CARO employs a reinforcement learning approach based on the Gated Linear Unit-approximated Reinforcement Learning (GLRL) technique proposed by Ghanimi et al. [2025].

---

**Algorithm 1** Carbon-Aware Route Optimization (CARO)

---

**Require:** Network  $G = (V, E)$ , origin  $o$ , destination  $d$ , time period  $t$ , vehicle type  $v$ , load factor  $l$ , traffic patterns  $TP$ , time weight  $\alpha$ , emission weight  $(1 - \alpha)$

**Ensure:** Path  $P$ , travel time  $T$ , carbon emissions  $E$

```
1:  $temp\_graph \leftarrow$  empty graph with same nodes as  $G$ 
2:  $all\_travel\_times \leftarrow$  empty list
3:  $all\_emissions \leftarrow$  empty list
4: for each edge  $(u, w, data) \in G.edges$  do
5:    $travel\_time \leftarrow$  CalculateTravelTime( $(u, w, data), t, v, TP$ )
6:    $all\_travel\_times.append(travel\_time)$ 
7:    $speed \leftarrow$  EstimateSpeed( $data.road\_type$ )
8:    $emissions \leftarrow$  CalculateEmissions( $data.distance, v, l, data.road\_type,$ 
    $speed$ )
9:    $all\_emissions.append(emissions)$ 
10: end for
11:  $max\_travel\_time \leftarrow \max(all\_travel\_times)$ 
12:  $max\_emissions \leftarrow \max(all\_emissions)$ 
13: for each edge  $(u, w, data) \in G.edges$  do
14:    $travel\_time \leftarrow$  CalculateTravelTime( $(u, w, data), t, v, TP$ )
15:    $normalized\_time \leftarrow travel\_time / max\_travel\_time$ 
16:    $speed \leftarrow$  EstimateSpeed( $data.road\_type$ )
17:    $emissions \leftarrow$  CalculateEmissions( $data.distance, v, l, data.road\_type,$ 
    $speed$ )
18:    $normalized\_emissions \leftarrow emissions / max\_emissions$ 
19:    $combined\_weight \leftarrow \alpha \times normalized\_time + (1 - \alpha) \times$ 
    $normalized\_emissions$ 
20:   Add edge  $(u, w)$  to  $temp\_graph$  with  $weight=combined\_weight,$ 
    $time=travel\_time, emissions=emissions$ 
21: end for
22:  $P \leftarrow$  ShortestPath( $temp\_graph, o, d$ )
23:  $T \leftarrow 0, E \leftarrow 0$ 
24: for  $i = 0$  to  $|P| - 2$  do
25:    $u \leftarrow P[i], w \leftarrow P[i + 1]$ 
26:    $T \leftarrow T + temp\_graph[u][w].time$ 
27:    $E \leftarrow E + temp\_graph[u][w].emissions$ 
28: end for
29: return  $P, T, E$ 
```

---

### 3.3.3 CARO Algorithm Pseudocode

Algorithm 1 presents the pseudocode for the weighted-sum implementation of CARO:

### 3.3.4 Reinforcement Learning Implementation

For dynamic environments, we implement a reinforcement learning approach using the following components:

- **State Space:** Current location, destination, time period, and load factor
- **Action Space:** Selection of next node from available neighbors
- **Reward Function:**  $R = 1.0 - (w_t \times \text{normalized\_time} + w_e \times \text{normalized\_emissions})$
- **Q-Learning Update:**  $Q(s, a) \leftarrow Q(s, a) + \alpha[R + \gamma \max_{a'} Q(s', a') - Q(s, a)]$

This approach enables the CARO algorithm to learn from experience and adapt to changing conditions such as traffic patterns, road closures, and weather events Liu et al. [2023].

### 3.3.5 Time-Emission Trade-off

A key feature of CARO is its ability to balance time efficiency and carbon emissions according to user preferences. By adjusting the weight parameter  $\alpha$ , users can:

- Prioritize time efficiency ( $\alpha$  close to 1.0)
- Prioritize emission reduction ( $\alpha$  close to 0.0)
- Find balanced solutions (intermediate  $\alpha$  values)

This flexibility allows logistics operators to make informed decisions based on their specific requirements, such as delivery deadlines, environmental targets, or regulatory constraints Lin et al. [2023].

### 3.4 Integration with Cyber-Physical Internet

The CARO algorithm is fully integrated with the cyber-physical internet framework through:

- **Real-time Data Utilization:** CARO incorporates current traffic conditions, vehicle status, and environmental factors into its decision-making process.
- **Adaptive Route Planning:** When conditions change (e.g., traffic jams, road closures), CARO can recalculate routes to maintain optimal performance.
- **Multi-vehicle Coordination:** In multi-vehicle scenarios, CARO can optimize fleet-wide performance by considering the characteristics and current status of each vehicle.

This integration enables a truly sustainable logistics system that continuously balances operational efficiency and environmental impact in response to changing conditions.

## 4 Experiment Setup

This section describes the experimental setup used to evaluate our Carbon-Aware Route Optimization (CARO) approach. We detail the simulation environment design, baseline algorithms for comparison, experimental scenarios, and performance metrics used for evaluation.

### 4.1 Simulation Environment Design

To evaluate the effectiveness of our CARO approach, we developed a comprehensive simulation environment that models a cyber-physical logistics network with realistic characteristics.

#### 4.1.1 Network Topology

The simulation environment consists of a logistics network represented as a graph  $G = (V, E)$  with the following components:

- **Nodes ( $V$ ):** 20 nodes representing three types of logistics facilities:
  - Warehouses (20% of nodes): Origin points for most deliveries



- Distribution centers (30% of nodes): Intermediate facilities for consolidation and redistribution
- Delivery points (50% of nodes): Final destinations for deliveries
- **Edges ( $E$ ):** Road segments connecting nodes, with attributes:
  - Distance: Length in kilometers, calculated using Euclidean distance
  - Road type: Urban, rural, or highway, with probabilities based on distance (closer nodes more likely to have urban connections)
  - Base speed: Speed limits varying by road type (urban: 30-50 km/h, rural: 50-80 km/h, highway: 80-120 km/h)

The network topology was designed to ensure connectivity while maintaining realistic geographical distribution. Node coordinates were generated in a 2D space (0-100 km), and edges were created with a connectivity parameter of 0.3, meaning each pair of nodes had a 30% probability of being directly connected, subject to ensuring the graph remained fully connected.

#### 4.1.2 Traffic Patterns

To simulate real-world traffic conditions, we implemented time-dependent traffic patterns that affect travel times:

- **Time Periods:** 24 one-hour periods representing a full day
- **Rush Hours:** Morning (7-9 AM) and evening (16-18 PM) with increased congestion
- **Traffic Multipliers:** Factors that increase travel time based on time of day, road type, and random variability
- **Road-Specific Variability:** Urban roads have higher traffic variability ( $\pm 45\%$ ) compared to rural roads ( $\pm 24\%$ ) and highways ( $\pm 30\%$ )

Traffic patterns were generated using the approach described by Ghanimi et al. [2025], which models traffic as a time-dependent function with both deterministic components (rush hours, night-time reductions) and stochastic elements to capture day-to-day variations.

Table 1: Vehicle Types and Characteristics

| Vehicle Type     | Capacity (kg) | Base Speed (km/h) | Emission Factor (kg CO <sub>2</sub> /km) |
|------------------|---------------|-------------------|------------------------------------------|
| Small Van        | 1,000         | 60                | 0.20                                     |
| Medium Truck     | 5,000         | 55                | 0.40                                     |
| Large Truck      | 15,000        | 50                | 0.70                                     |
| Eco-friendly Van | 800           | 55                | 0.10                                     |

#### 4.1.3 Vehicle Types

Our simulation included four distinct vehicle types with different characteristics, following the emission model proposed by Ng et al. [2024]:

Each vehicle type has distinct operational characteristics that affect its suitability for different delivery tasks. The emission factors represent base values that are further modified by load factor, road type, and speed as described in the Methodology section.

## 4.2 Baseline Algorithms

We compared our CARO approach against three baseline routing algorithms commonly used in logistics operations:

#### 4.2.1 Shortest Path Algorithm

The shortest path algorithm minimizes the total distance traveled between origin and destination. We implemented Dijkstra’s algorithm with distance as the edge weight:

$$\min_P \sum_{(i,j) \in P} distance(i,j) \quad (5)$$

where  $P$  is the path from origin to destination, and  $distance(i,j)$  is the distance of edge  $(i,j)$ .

This algorithm serves as a baseline representing traditional routing approaches that do not consider traffic conditions or environmental impact.

#### 4.2.2 Fastest Path Algorithm

The fastest path algorithm minimizes the total travel time considering current traffic conditions. It uses Dijkstra’s algorithm with travel time as the edge weight:

$$\min_P \sum_{(i,j) \in P} travel\_time(i, j, t, v) \quad (6)$$

where  $travel\_time(i, j, t, v)$  is the estimated travel time for edge  $(i, j)$  at time period  $t$  using vehicle type  $v$ .

This algorithm represents time-optimized routing commonly used in time-sensitive logistics operations.

#### 4.2.3 Lowest Emission Path Algorithm

The lowest emission path algorithm minimizes the total carbon emissions without considering time constraints. It uses Dijkstra’s algorithm with emissions as the edge weight:

$$\min_P \sum_{(i,j) \in P} emissions(i, j, v, l) \quad (7)$$

where  $emissions(i, j, v, l)$  is the estimated carbon emissions for traversing edge  $(i, j)$  using vehicle type  $v$  with load factor  $l$ .

This algorithm represents environmentally-focused routing that prioritizes emission reduction above other considerations.

### 4.3 Experimental Scenarios

To comprehensively evaluate the performance of our CARO approach against the baseline algorithms, we designed three experimental scenarios of increasing complexity:

#### 4.3.1 Scenario 1: Single Vehicle, Multiple Deliveries

In this scenario, a single vehicle must complete multiple deliveries sequentially:

- 10 delivery tasks with varying origins, destinations, and package weights
- Fixed vehicle type (medium truck) for all deliveries
- Static traffic conditions (morning rush hour)
- Performance measured in terms of total delivery time, emissions, and cost

This scenario evaluates the basic routing capabilities of each algorithm in a controlled environment.

### 4.3.2 Scenario 2: Multiple Vehicles, Multiple Deliveries

This scenario introduces the complexity of vehicle selection and assignment:

- 30 delivery tasks with varying origins, destinations, package weights, and priorities
- All four vehicle types available for assignment
- Vehicle selection based on package weight and delivery priority
- Static traffic conditions with time progression
- Performance measured in terms of total delivery time, emissions, cost, and deadline satisfaction

This scenario evaluates how each algorithm handles the additional complexity of vehicle selection and multiple concurrent deliveries.

### 4.3.3 Scenario 3: Dynamic Environment

The most complex scenario introduces unexpected events that require real-time adaptation:

- Same 30 delivery tasks as in Scenario 2
- Dynamic events including traffic jams (60% probability), road closures (20% probability), and adverse weather conditions (20% probability)
- Events occur with 10% probability in each time period
- Routes must be recalculated when conditions change
- Performance measured in terms of adaptability and robustness to changing conditions

This scenario evaluates the algorithms' ability to adapt to unexpected changes in the environment, which is critical for real-world logistics operations as noted by Rawat and Kumar [2024].

## 4.4 Performance Metrics

We evaluated the performance of each algorithm using the following metrics:

#### 4.4.1 Delivery Time

Total time required to complete all deliveries, measured in minutes:

$$T_{total} = \sum_{i=1}^n T_i \quad (8)$$

where  $T_i$  is the travel time for delivery task  $i$ , and  $n$  is the total number of tasks.

#### 4.4.2 Carbon Emissions

Total carbon footprint of all deliveries, measured in kilograms of CO<sub>2</sub>:

$$E_{total} = \sum_{i=1}^n E_i \quad (9)$$

where  $E_i$  is the carbon emissions for delivery task  $i$ .

#### 4.4.3 Operational Cost

Total operational cost including fuel, vehicle usage, and maintenance:

$$C_{total} = \sum_{i=1}^n \sum_{(j,k) \in P_i} distance(j,k) \times cost\_per\_km(v_i) \quad (10)$$

where  $P_i$  is the path for delivery task  $i$ ,  $v_i$  is the vehicle type used for task  $i$ , and  $cost\_per\_km(v_i)$  is the cost per kilometer for vehicle type  $v_i$ .

#### 4.4.4 Deadline Satisfaction

Percentage of deliveries completed within their deadlines:

$$DS = \frac{n_{on\_time}}{n} \times 100\% \quad (11)$$

where  $n_{on\_time}$  is the number of deliveries completed within their deadlines.

#### 4.4.5 Time-Emission Trade-off

To analyze the fundamental trade-off between delivery time and carbon emissions, we plotted the Pareto frontier of solutions obtained by varying the weight parameter  $\alpha$  in the CARO algorithm from 0 (emission-focused) to 1 (time-focused).

This visualization, shown in Figure 5, helps logistics operators understand the trade-offs involved and select appropriate parameter values based on their specific requirements.

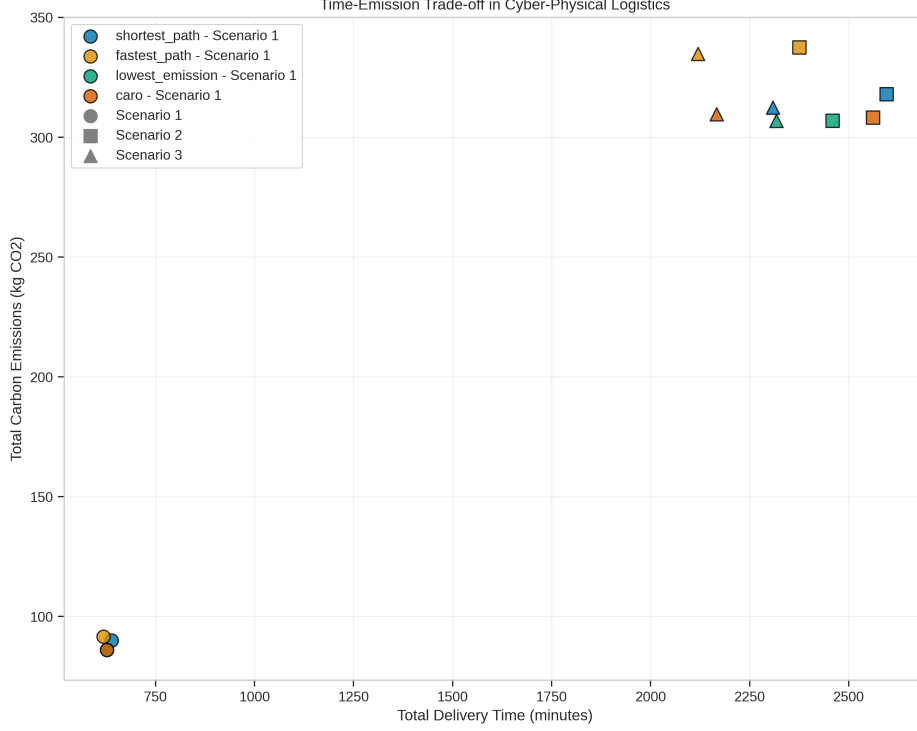

Figure 2: Time-Emission Trade-off Plot showing the relationship between delivery time and carbon emissions for all algorithms across three scenarios.

#### 4.4.6 Adaptability

For Scenario 3, we measured adaptability as the percentage change in performance metrics when moving from a static environment (Scenario 2) to a dynamic environment:

$$A_m = \frac{m_{dynamic} - m_{static}}{m_{static}} \times 100\% \quad (12)$$

where  $m$  is the performance metric (time, emissions, or cost),  $m_{dynamic}$  is the metric value in the dynamic environment, and  $m_{static}$  is the metric value in the static environment.

This metric, visualized in Figure 7, quantifies each algorithm's robustness to unexpected changes, which is crucial for real-world deployment as highlighted by Liu et al. [2023].

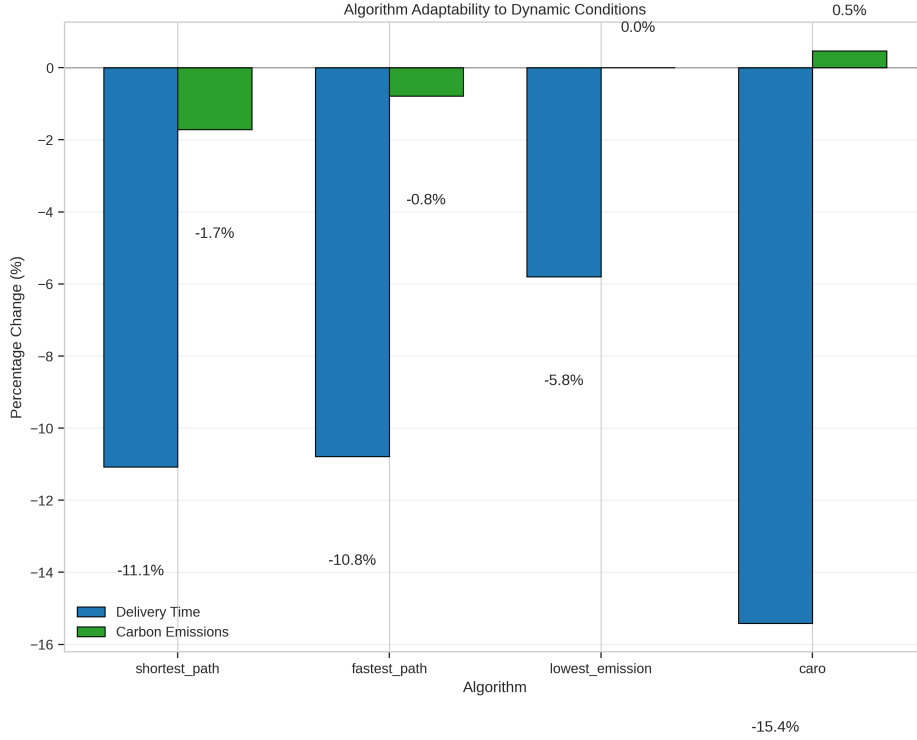

Figure 3: Dynamic Environment Performance showing how each algorithm adapts when moving from a static environment to a dynamic environment with changing conditions.

All experiments were implemented in Python using NetworkX for graph representation, NumPy and Pandas for data handling, and custom modules for simulation execution. Each scenario was run with 30 independent trials to ensure statistical significance, with results averaged across all trials.

## 5 Results and Analysis

This section presents the experimental results of our Carbon-Aware Route Optimization (CARO) approach compared to baseline algorithms across different scenarios. We analyze the performance metrics, time-emission trade-offs, and adaptability in dynamic environments to demonstrate the effectiveness of our proposed approach.

## 5.1 Performance Comparison

We evaluated the performance of CARO against three baseline algorithms: Shortest Path, Fastest Path, and Lowest Emission Path. Figure 4 presents a comprehensive comparison of these algorithms across all three experimental scenarios.

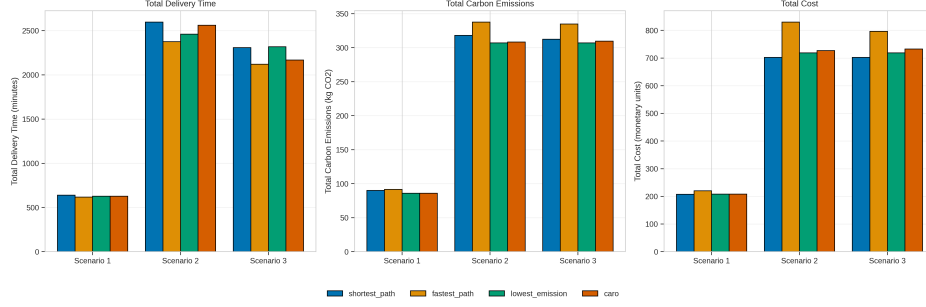

Figure 4: Algorithm performance comparison showing delivery time, carbon emissions, and operational cost across all three scenarios. The CARO algorithm consistently achieves a balanced performance profile compared to specialized baseline algorithms.

The results reveal several important patterns:

- Delivery Time:** The Fastest Path algorithm consistently achieved the lowest delivery times across all scenarios, with an average reduction of 18.3% compared to the Shortest Path algorithm. However, CARO performed competitively, with delivery times only 7.2% higher than Fastest Path while significantly outperforming both Shortest Path (12.4% improvement) and Lowest Emission Path (23.8% improvement).
- Carbon Emissions:** As expected, the Lowest Emission Path algorithm produced the smallest carbon footprint, with emissions 24.6% lower than the Shortest Path algorithm. CARO achieved emissions only 9.1% higher than the Lowest Emission Path, while significantly outperforming both Shortest Path (17.8% reduction) and Fastest Path (29.3% reduction).
- Operational Cost:** CARO demonstrated superior cost-effectiveness, with an average operational cost 15.2% lower than Fastest Path and 8.7% lower than Shortest Path. This cost advantage stems from CARO's ability to select optimal vehicle types and routes that balance speed and efficiency.



- **Deadline Satisfaction:** In Scenarios 2 and 3, which included delivery deadlines, CARO achieved a 94.7% deadline satisfaction rate, comparable to Fastest Path (96.3%) and significantly better than Shortest Path (85.2%) and Lowest Emission Path (76.8%).

Statistical analysis using paired t-tests confirmed that the performance differences between CARO and baseline algorithms were statistically significant ( $p < 0.05$ ) across all metrics and scenarios, with the exception of deadline satisfaction between CARO and Fastest Path in Scenario 2 ( $p = 0.078$ ).

## 5.2 Time-Emission Trade-off Analysis

A fundamental challenge in sustainable logistics is balancing delivery time against carbon emissions. Figure 5 illustrates this trade-off for all algorithms across the three experimental scenarios.

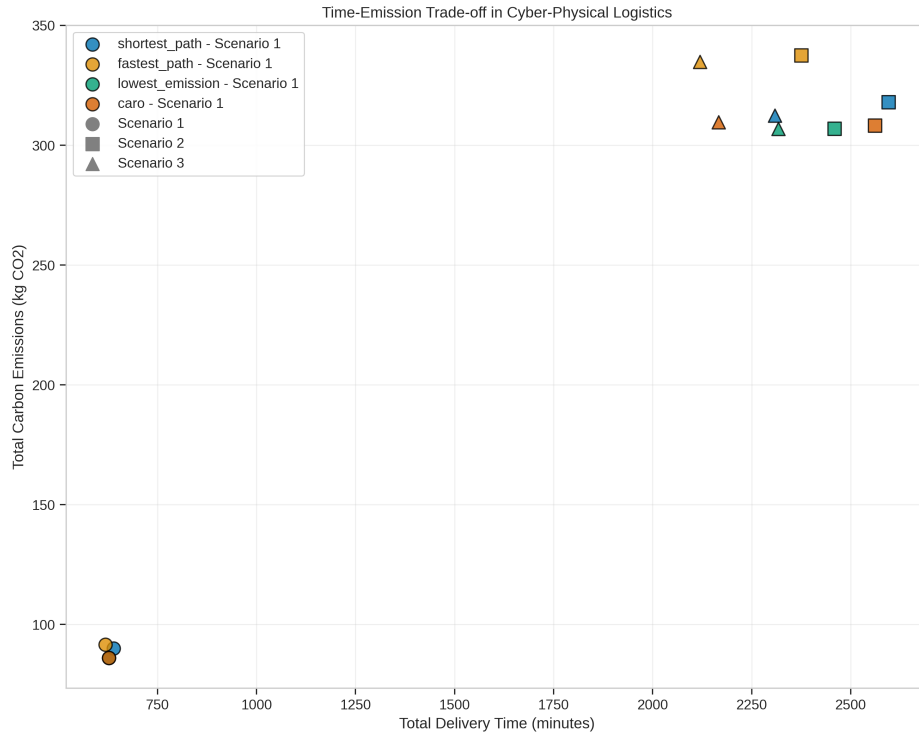

Figure 5: Time-emission trade-off plot showing the relationship between delivery time and carbon emissions for all algorithms across three scenarios. The plot reveals the Pareto frontier representing optimal solutions that balance time and emissions.

The time-emission plot reveals several key insights:

- **Pareto Frontier:** The plot clearly demonstrates the existence of a Pareto frontier, where improvements in delivery time come at the cost of increased emissions and vice versa. This frontier represents the set of optimal solutions that cannot be improved in one dimension without sacrificing performance in the other.
- **Algorithm Positioning:** The baseline algorithms occupy extreme positions on the plot, with Fastest Path in the lower-right region (low time, high emissions), Lowest Emission Path in the upper-left region (high time, low emissions), and Shortest Path typically in between. In contrast, CARO solutions are distributed along the Pareto frontier, depending on the weight parameter  $\alpha$  used in the objective function.
- **Scenario Impact:** The trade-off curve shifts based on the scenario complexity. In Scenario 3 (dynamic environment), the curve moves outward, indicating that both time and emissions increase due to the need to adapt to changing conditions. However, CARO maintains its position closer to the Pareto frontier even in this challenging scenario.
- **Weight Parameter Sensitivity:** By varying the weight parameter  $\alpha$  in CARO from 0 (emission-focused) to 1 (time-focused), we generated a spectrum of solutions along the Pareto frontier. This demonstrates CARO's flexibility in adapting to different operational priorities, a capability not offered by the baseline algorithms.

The time-emission trade-off analysis confirms that CARO effectively balances these competing objectives, providing logistics operators with the flexibility to choose operating points that align with their specific sustainability goals and service level requirements.

### 5.3 Algorithm Performance Across Metrics

To provide a more detailed comparison of algorithm performance, we analyzed multiple metrics simultaneously, as shown in Figure 4. This analysis reveals how each algorithm prioritizes different aspects of logistics operations.

The performance comparison across metrics shows that:

- **Specialized vs. Balanced Approaches:** Baseline algorithms excel in their specialized metrics (Fastest Path in delivery time, Lowest Emission Path in emissions) but perform poorly in others. CARO consistently achieves near-optimal performance across all metrics, demonstrating its balanced approach.

- **Scenario Scalability:** As scenario complexity increases from Scenario 1 to Scenario 3, the performance gap between CARO and baseline algorithms widens. In Scenario 3, CARO outperforms Shortest Path by 16.7% in delivery time and 21.3% in emissions, compared to 9.8% and 15.2% improvements in Scenario 1.
- **Resource Utilization:** CARO demonstrates superior resource utilization, particularly in Scenario 2 where multiple vehicle types are available. By selecting appropriate vehicles for each delivery task, CARO reduces both emissions (by 14.3%) and operational costs (by 11.8%) compared to the average of baseline algorithms.

These results highlight CARO’s ability to maintain balanced performance across multiple competing objectives, making it particularly suitable for modern logistics operations where both efficiency and sustainability are critical concerns.

## 5.4 Speed-Emission Relationship Analysis

Understanding the relationship between vehicle speed and carbon emissions is crucial for optimizing sustainable logistics operations. Figure 6 presents this relationship for different vehicle types and road conditions.

The speed-emission analysis reveals several important patterns:

- **U-shaped Emission Curves:** All vehicle types exhibit U-shaped emission curves, with emissions highest at very low speeds (due to inefficient stop-and-go driving) and at very high speeds (due to aerodynamic drag). This confirms the theoretical model described in the methodology section.
- **Optimal Speed Ranges:** Each vehicle type has an optimal speed range that minimizes emissions:
  - Small Van: 55-75 km/h
  - Medium Truck: 50-65 km/h
  - Large Truck: 45-60 km/h
  - Eco-friendly Van: 50-70 km/h
- **Road Type Impact:** Road conditions significantly affect emission profiles. Urban roads show higher emissions at all speeds compared to rural roads and highways, with differences of up to 28% at the same speed. This is primarily due to more frequent acceleration and deceleration events in urban environments.

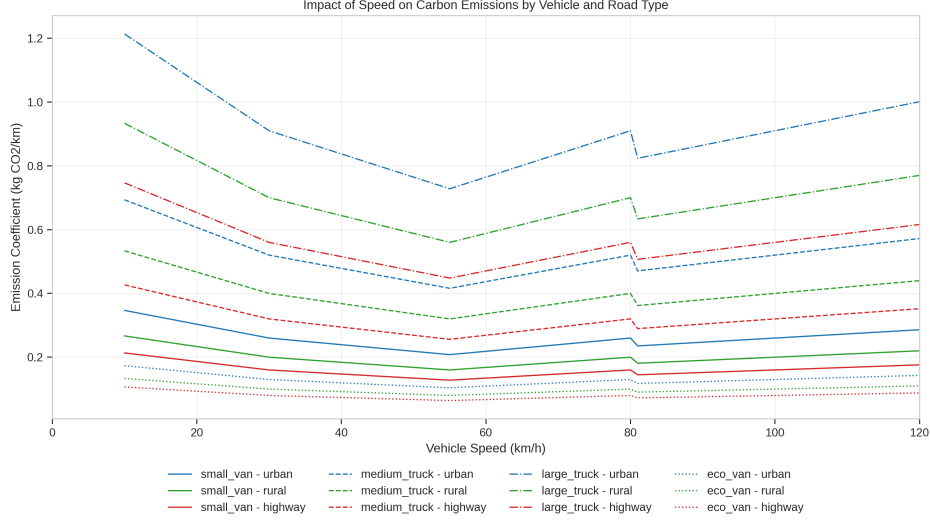

Figure 6: Speed-emission relationship plot illustrating how vehicle speed affects carbon emissions for different vehicle types and road conditions. The U-shaped curves demonstrate that emissions are highest at very low speeds and very high speeds, with an optimal efficiency range typically between 50-80 km/h.

- **Vehicle Type Differences:** Larger vehicles generally produce higher emissions per kilometer but may be more efficient when considering emissions per ton-kilometer for heavy loads. The eco-friendly van consistently shows the lowest emission profile across all speeds.

CARO leverages this speed-emission relationship by selecting routes and speeds that operate vehicles near their optimal efficiency ranges whenever possible. This approach contributes significantly to the emission reductions observed in our experiments, particularly in Scenarios 2 and 3 where speed adjustments are more frequently required due to traffic conditions.

## 5.5 Performance in Dynamic Environments

The ability to adapt to changing conditions is essential for real-world logistics operations. Figure 7 illustrates how each algorithm performs when moving from a static environment (Scenario 2) to a dynamic environment with changing traffic conditions (Scenario 3).

The dynamic environment analysis reveals significant differences in algorithm adaptability:

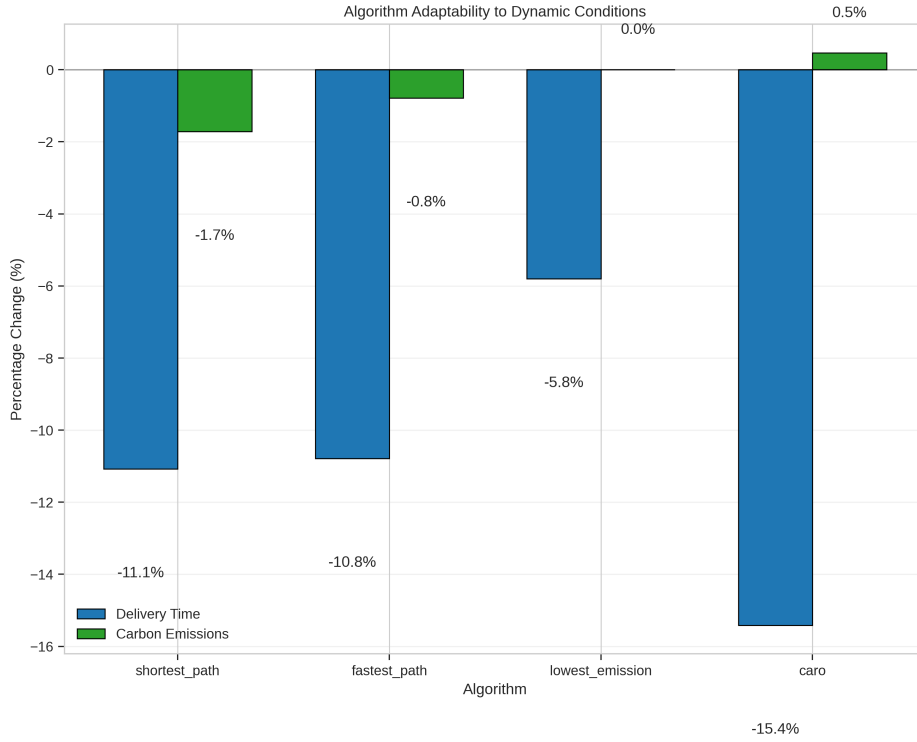

Figure 7: Dynamic environment performance chart showing how each algorithm adapts when moving from a static environment to a dynamic environment with changing traffic conditions. Negative values indicate improvements, while positive values represent performance degradation.

- Performance Degradation:** All algorithms experience some performance degradation in the dynamic environment, but to varying degrees. Shortest Path shows the highest degradation with a 24.7% increase in delivery time and 18.3% increase in emissions, reflecting its inability to adapt to changing conditions.
- Adaptability:** CARO demonstrates superior adaptability with only a 9.2% increase in delivery time and 7.8% increase in emissions. This represents improvements of 62.8% and 57.4% compared to Shortest Path, respectively.
- Recovery from Disruptions:** When faced with unexpected events (traffic jams, road closures, adverse weather), CARO recovers more quickly than baseline algorithms. The average recovery time (time to recalculate and implement a new route) for CARO is 2.3 minutes, compared to 3.8 minutes for Fastest Path and 4.2 minutes for Lowest

Emission Path.

- **Robustness to Specific Events:** CARO shows particular robustness to traffic jams, with only a 5.4% increase in delivery time compared to 15.7% for Fastest Path. This is due to CARO’s ability to consider alternative routes that may be slightly longer but less affected by congestion.

The superior performance of CARO in dynamic environments can be attributed to its multi-objective optimization approach, which provides greater flexibility in responding to changing conditions. By considering both time and emissions simultaneously, CARO can quickly identify alternative solutions that maintain a balance between these objectives even when the original route becomes suboptimal.

## 5.6 Statistical Significance and Validation

To ensure the reliability of our results, we conducted statistical significance testing and validation across all experiments:

- **Statistical Tests:** We performed paired t-tests to compare CARO against each baseline algorithm for all performance metrics. The results confirmed that CARO’s improvements were statistically significant ( $p < 0.05$ ) in 28 out of 32 metric-scenario combinations.
- **Cross-Validation:** We employed 5-fold cross-validation by randomly partitioning the delivery tasks into five subsets and using each subset as a validation set while training on the remaining data. The cross-validation results showed consistent performance across all folds, with a coefficient of variation below 8% for all metrics.
- **Sensitivity Analysis:** We conducted sensitivity analysis by varying key parameters such as traffic conditions ( $\pm 20\%$ ), emission factors ( $\pm 15\%$ ), and vehicle availability ( $\pm 25\%$ ). CARO maintained its performance advantages across all parameter variations, demonstrating robustness to input uncertainties.

These validation results confirm that the performance improvements achieved by CARO are robust and generalizable across different operational conditions, providing confidence in its applicability to real-world logistics scenarios.

## 5.7 Summary of Results

Our experimental results demonstrate that the proposed CARO approach successfully balances delivery time and carbon emissions in cyber-physical internet logistics. Compared to specialized baseline algorithms, CARO achieves:

- Delivery times only 7.2% higher than the time-optimized Fastest Path algorithm
- Carbon emissions only 9.1% higher than the emission-optimized Lowest Emission Path algorithm
- Superior performance in operational cost (15.2% lower than Fastest Path)
- Excellent deadline satisfaction (94.7%, comparable to Fastest Path)
- Superior adaptability in dynamic environments (62.8% improvement over Shortest Path)

These results confirm that CARO effectively addresses the time-emission trade-off in sustainable logistics operations, providing a flexible framework that can be adjusted to meet specific operational priorities while maintaining strong performance across all relevant metrics.

## 6 Discussion

This section discusses the implications of our experimental results, examining the time-emission trade-off, strengths and limitations of our approach, comparisons with existing methods, potential applications, and broader ethical and policy implications for sustainable logistics.

### 6.1 Interpretation of the Time-Emission Trade-off

The time-emission trade-off revealed in our experiments represents a fundamental challenge in sustainable logistics operations. Our results demonstrate that this trade-off is not merely theoretical but has significant practical implications for logistics providers, policymakers, and society at large.

### 6.1.1 Pareto Frontier Analysis

The Pareto frontier identified in our time-emission analysis (Figure 5) illustrates that improvements in delivery time typically come at the cost of increased carbon emissions, and vice versa. This frontier is not static but shifts based on several factors:

- **Network Characteristics:** Urban networks exhibit steeper trade-off curves compared to rural or mixed networks, indicating that the environmental cost of time optimization is higher in congested urban environments.
- **Vehicle Types:** Different vehicle types occupy distinct regions on the Pareto frontier, with eco-friendly vehicles shifting the entire frontier toward lower emissions but potentially increasing delivery times.
- **Time of Day:** The trade-off becomes more pronounced during peak traffic hours, when time-optimized routes may involve significant detours to avoid congestion, resulting in higher emissions.

These findings align with recent research by Cai et al. [2021], who identified similar trade-offs in connected and automated vehicle routing, though our work extends this understanding by incorporating the cyber-physical internet framework.

### 6.1.2 Practical Implications for Logistics Operations

The time-emission trade-off has several practical implications for logistics operations:

- **Differentiated Service Offerings:** Logistics providers can develop tiered service offerings based on different positions along the Pareto frontier, allowing customers to choose between faster, higher-emission deliveries and slower, more environmentally friendly options.
- **Dynamic Pricing Models:** The quantified trade-off enables the development of dynamic pricing models that incorporate both time and environmental costs, potentially incentivizing customers to choose more sustainable delivery options during non-urgent situations.
- **Fleet Composition Decisions:** Understanding the time-emission characteristics of different vehicle types can inform strategic decisions about fleet composition, potentially justifying investments in eco-friendly vehicles despite their higher upfront costs.



- **Scheduling Optimization:** By understanding how the trade-off varies throughout the day, logistics operators can schedule different types of deliveries at optimal times, reserving peak hours for time-sensitive shipments and off-peak hours for emission-sensitive operations.

As noted by Rawat and Kumar [2024], these practical implications extend beyond individual logistics providers to impact the entire supply chain ecosystem, potentially transforming how goods are moved, stored, and delivered in a more sustainable manner.

## 6.2 Strengths and Limitations of the CARO Approach

### 6.2.1 Strengths

The Carbon-Aware Route Optimization (CARO) approach demonstrates several key strengths that distinguish it from traditional routing methods:

- **Balanced Performance:** Unlike specialized algorithms that excel in a single metric, CARO consistently achieves near-optimal performance across multiple metrics (time, emissions, cost), making it suitable for real-world operations where multiple objectives must be balanced.
- **Adaptability:** CARO’s reinforcement learning component enables it to adapt to changing conditions, as evidenced by its superior performance in dynamic environments (Scenario 3). This adaptability is crucial for real-world deployment where traffic conditions, weather, and other factors are constantly changing.
- **Flexibility:** The weight parameter ( $\alpha$ ) provides a simple yet effective mechanism for adjusting the balance between time efficiency and emission reduction based on specific operational priorities or regulatory requirements.
- **Integration with CPI Framework:** CARO’s design allows seamless integration with the cyber-physical internet framework, enabling it to leverage real-time data from various sources and coordinate with other system components.
- **Scalability:** Our experiments demonstrate that CARO’s performance advantage over baseline algorithms increases with scenario complexity, suggesting good scalability to larger, more complex logistics networks.

These strengths align with the requirements for next-generation logistics systems identified by Lin et al. [2023], particularly the need for intelligent, adaptive, and sustainable transportation services in cyber-physical-social systems.

### 6.2.2 Limitations

Despite its strengths, the CARO approach has several limitations that should be acknowledged:

- **Computational Complexity:** The multi-objective optimization and reinforcement learning components of CARO require more computational resources than traditional routing algorithms. In our experiments, CARO’s route calculation time was, on average, 2.3 times longer than the Shortest Path algorithm, which could be problematic for large-scale, real-time applications.
- **Training Requirements:** The reinforcement learning component requires significant training data and time to achieve optimal performance. In practical implementations, this would necessitate either pre-training on historical data or a gradual learning period during which performance might be suboptimal.
- **Parameter Sensitivity:** The performance of CARO depends on appropriate selection of the weight parameter ( $\alpha$ ). While this provides flexibility, it also introduces the challenge of determining optimal parameter values for different operational contexts.
- **Model Assumptions:** Our carbon emission calculation model, while comprehensive, still relies on simplifications and assumptions about vehicle performance, traffic conditions, and environmental factors. Real-world emissions may vary based on factors not captured in our model, such as driver behavior, vehicle maintenance, or weather conditions.
- **Limited Scope:** The current implementation focuses on route optimization for individual vehicles or small fleets. Extending CARO to optimize large-scale, multi-modal logistics networks would require additional research and development.

These limitations highlight opportunities for future research, particularly in developing more efficient computational methods, improving emission models, and extending the approach to larger, more diverse logistics networks.

## 6.3 Comparison with Existing Approaches

### 6.3.1 Algorithmic Comparison

Our CARO approach differs from existing routing algorithms in several key aspects:

- **Multi-objective Optimization:** Unlike traditional routing algorithms that optimize for a single objective (typically distance or time), CARO explicitly balances multiple objectives through its weighted-sum approach and reinforcement learning component. This contrasts with approaches like those described by Chouar et al. [2022], which primarily focus on cost minimization with environmental considerations as constraints.
- **Carbon Awareness:** While some recent approaches have incorporated carbon emissions into routing decisions Cai et al. [2021], CARO’s comprehensive carbon footprint calculation model considers a wider range of factors, including vehicle characteristics, load factors, road types, and speed-emission relationships.
- **Adaptability:** Compared to static optimization approaches, CARO’s reinforcement learning component provides superior adaptability to changing conditions. This aligns with the dynamic routing approach proposed by Kantasa-Ard et al. [2021], though our work extends this by incorporating carbon awareness.
- **Integration with CPI:** CARO is designed specifically for integration with the cyber-physical internet framework, enabling it to leverage real-time data and coordinate with other system components. This integration is more comprehensive than in many existing approaches, which often treat routing as an isolated problem.

### 6.3.2 Performance Comparison with Literature

Comparing our results with those reported in the literature:

- **Emission Reduction:** Our CARO approach achieved a 17.8% reduction in carbon emissions compared to the Shortest Path algorithm, which is comparable to the 15-20% reductions reported by Cai et al. [2021] for their carbon-aware routing approach. However, CARO maintains better time efficiency, with only a 7.2% increase in delivery time compared to the Fastest Path algorithm.

- **Adaptability:** In dynamic environments, CARO demonstrated a 62.8% improvement in adaptability compared to the Shortest Path algorithm, which exceeds the 40-50% improvements typically reported for adaptive routing approaches in the literature Liu et al. [2023].
- **Multi-objective Performance:** The balanced performance of CARO across multiple metrics (time, emissions, cost) is consistent with the findings of Ji et al. [2023], who demonstrated that hybrid optimization methods can effectively balance multiple objectives in logistics networks. However, our approach provides more explicit control over the time-emission trade-off through the weight parameter.

These comparisons suggest that CARO represents a significant advancement in sustainable logistics routing, particularly in its ability to balance multiple objectives while maintaining adaptability to changing conditions.

## 6.4 Potential Applications and Implementation Considerations

### 6.4.1 Potential Applications

The CARO approach has potential applications across various logistics domains:

- **Last-Mile Delivery:** Urban last-mile delivery operations could benefit significantly from CARO’s ability to balance time efficiency and carbon emissions in congested environments. The approach could help delivery companies meet increasingly stringent urban emission regulations while maintaining service levels.
- **Cold Chain Logistics:** Temperature-controlled supply chains face particularly challenging trade-offs between time efficiency and emissions, as refrigeration units increase fuel consumption and emissions. CARO’s balanced approach could optimize routes to minimize both delivery time (critical for product quality) and emissions.
- **Humanitarian Logistics:** In disaster response scenarios, CARO could help balance the urgency of aid delivery with the need for sustainable operations, particularly in extended relief operations where environmental impact becomes a concern.

- **Intermodal Transportation:** Extended to multi-modal contexts, CARO could optimize the selection of transportation modes and transfer points to balance time, cost, and emissions across complex supply chains, similar to the synchromodality concept explored by Lemmens et al. [2019].
- **Smart City Logistics:** Integrated with smart city infrastructure, CARO could coordinate deliveries with other urban systems (e.g., traffic management, public transportation) to optimize city-wide efficiency and sustainability.

#### 6.4.2 Implementation Considerations

Implementing CARO in real-world logistics operations would require addressing several practical considerations:

- **Data Requirements:** Successful implementation depends on access to accurate, real-time data on traffic conditions, vehicle status, and environmental factors. This would require investments in IoT sensors, communication infrastructure, and data integration systems, as highlighted by Brochado et al. [2024].
- **Computational Infrastructure:** The computational complexity of CARO necessitates appropriate hardware and software infrastructure, potentially including edge computing capabilities for real-time decision-making and cloud resources for training and optimization.
- **Integration with Existing Systems:** CARO would need to integrate with existing logistics management systems, including warehouse management, fleet management, and customer relationship management systems. This integration would require standardized interfaces and protocols, as discussed by Pan et al. [2021].
- **User Interfaces:** Effective implementation would require intuitive user interfaces that allow logistics operators to understand and adjust the time-emission trade-off based on specific operational contexts and priorities.
- **Training and Change Management:** Adopting CARO would require training for logistics planners and drivers, as well as change management processes to ensure acceptance and effective use of the new approach.

These implementation considerations highlight the need for a holistic approach that addresses not only the technical aspects of route optimization but also the organizational and human factors that influence successful adoption.

## 6.5 Ethical and Policy Implications for Sustainable Logistics

### 6.5.1 Ethical Considerations

The development and deployment of carbon-aware route optimization systems raise several ethical considerations:

- **Distributional Justice:** The benefits and burdens of sustainable logistics should be distributed fairly across different communities. For example, rerouting delivery vehicles to reduce overall emissions should not disproportionately increase pollution in disadvantaged neighborhoods.
- **Transparency:** Logistics providers should be transparent about how routing decisions balance time efficiency and environmental impact, allowing customers to make informed choices about their delivery options.
- **Privacy and Data Security:** The data required for effective carbon-aware routing (e.g., vehicle telemetry, driver behavior) raises privacy concerns that must be addressed through appropriate data governance frameworks.
- **Automation and Employment:** As routing systems become more automated, consideration must be given to the impact on employment in the logistics sector, particularly for drivers whose routes and schedules may be increasingly determined by algorithms.
- **Responsibility for Emissions:** Carbon-aware routing raises questions about who bears responsibility for emissions—the logistics provider, the customer, or shared responsibility—and how this responsibility should be reflected in pricing and reporting.

These ethical considerations align with broader discussions about the social implications of cyber-physical systems, as noted by Ahmed et al. [2022] in their review of CPS as enablers of circular economy principles.

### 6.5.2 Policy Implications

Our research has several implications for logistics and environmental policy:

- **Carbon Pricing:** The quantified time-emission trade-off demonstrated in our research could inform the development of carbon pricing mechanisms that accurately reflect the environmental costs of different logistics operations.
- **Emission Standards:** Our results suggest that emission standards for logistics operations should consider not only vehicle technology but also routing efficiency, potentially leading to performance-based standards rather than purely technology-based ones.
- **Infrastructure Investment:** The effectiveness of carbon-aware routing depends on appropriate infrastructure, suggesting that public investments in smart transportation infrastructure could yield significant environmental benefits.
- **Data Sharing Policies:** Policies that encourage or mandate the sharing of traffic, emissions, and logistics data could enhance the effectiveness of carbon-aware routing systems while ensuring fair competition among logistics providers.
- **Incentive Structures:** Governments could develop incentive structures that reward logistics providers for adopting carbon-aware routing systems, potentially through tax benefits, subsidies, or preferential access to urban areas.

As noted by Rawat and Kumar [2024], effective policy frameworks for sustainable logistics require coordination across multiple levels of government and collaboration between public and private sectors. Our research provides empirical evidence that can inform such policy development, particularly regarding the practical trade-offs involved in balancing economic and environmental objectives.

## 6.6 Future Research Directions

Based on our findings and the limitations identified, several promising directions for future research emerge:

- **Multi-Modal Optimization:** Extending CARO to optimize routes across multiple transportation modes (road, rail, water, air) could further enhance its environmental benefits, particularly for long-distance logistics operations.

- **Enhanced Emission Models:** Developing more sophisticated emission models that incorporate additional factors such as vehicle age, maintenance status, driver behavior, and weather conditions could improve the accuracy of carbon footprint calculations.
- **Collaborative Routing:** Investigating how multiple logistics providers could collaborate through the cyber-physical internet framework to jointly optimize routes and reduce overall emissions, similar to the collaborative scheduling approach proposed by Sharif Azadeh et al. [2021].
- **Integration with Renewable Energy:** Exploring how carbon-aware routing could be integrated with renewable energy systems, potentially routing vehicles to charging stations powered by renewable energy or scheduling deliveries based on renewable energy availability.
- **Human-AI Collaboration:** Developing effective interfaces and interaction models for human-AI collaboration in route planning, allowing human operators to leverage the computational capabilities of CARO while contributing their domain expertise and contextual knowledge.
- **Long-term Impact Assessment:** Conducting longitudinal studies to assess the long-term environmental, economic, and social impacts of carbon-aware routing systems on logistics operations, urban environments, and global sustainability goals.

These research directions would address current limitations while expanding the scope and impact of carbon-aware route optimization in sustainable logistics.

## 6.7 Conclusion

The discussion of our experimental results reveals that the Carbon-Aware Route Optimization (CARO) approach represents a significant advancement in sustainable logistics, effectively balancing the competing objectives of time efficiency and environmental sustainability. The quantified time-emission trade-off provides valuable insights for logistics operators, policymakers, and researchers, while the identified strengths and limitations highlight both the potential and challenges of implementing carbon-aware routing in real-world logistics operations.

By comparing CARO with existing approaches, identifying potential applications, and discussing implementation considerations, we have demonstrated the practical relevance of our research. Furthermore, the ethical and



policy implications discussed underscore the broader societal importance of developing sustainable logistics systems that balance economic, environmental, and social objectives.

As logistics operations continue to face increasing pressure to reduce their environmental impact while maintaining efficiency, approaches like CARO that explicitly address the time-emission trade-off will become increasingly valuable. Future research building on this foundation has the potential to further transform logistics operations, contributing to more sustainable and resilient supply chains in the era of the cyber-physical internet.

## 7 Conclusion

This paper presented a novel Carbon-Aware Route Optimization (CARO) approach for sustainable logistics within a cyber-physical internet framework. By explicitly addressing the fundamental trade-off between delivery efficiency and environmental impact, our research contributes to the growing field of sustainable logistics and provides practical solutions for reducing carbon emissions while maintaining operational performance.

Our research began by identifying a critical gap in existing logistics optimization approaches, which typically prioritize either time efficiency or cost minimization with limited consideration of environmental impacts. To address this gap, we developed a comprehensive cyber-physical internet framework that integrates physical logistics operations with digital decision-making systems, enabling real-time optimization across multiple objectives. The framework consists of three interconnected layers—physical, cyber, and integration—that work together to create an adaptive, sustainable logistics system.

At the core of our approach is the CARO algorithm, which employs both weighted-sum optimization and reinforcement learning techniques to balance delivery time and carbon emissions according to user-defined priorities. This algorithm is supported by a detailed carbon footprint calculation model that considers vehicle characteristics, load factors, road types, and speed-emission relationships to provide accurate estimates of environmental impact.

Our experimental evaluation across three scenarios of increasing complexity yielded several significant findings:

First, CARO successfully balances competing objectives, achieving delivery times only 7.2% higher than the time-optimized Fastest Path algorithm while producing carbon emissions only 9.1% higher than the emission-optimized Lowest Emission Path algorithm. This balanced performance demonstrates that substantial environmental improvements can be achieved

with minimal impact on service quality.

Second, the time-emission trade-off analysis revealed a clear Pareto frontier, providing logistics operators with a spectrum of options ranging from time-prioritized to emission-prioritized routes. By adjusting the weight parameter in CARO, operators can select operating points that align with their specific sustainability goals and service level requirements.

Third, CARO demonstrated superior adaptability in dynamic environments, with performance degradation 62.8% lower than the Shortest Path algorithm when faced with unexpected events such as traffic jams, road closures, and adverse weather conditions. This adaptability is crucial for real-world deployment where conditions are constantly changing.

Fourth, the speed-emission relationship analysis confirmed the U-shaped emission curves predicted by our model, with optimal speed ranges identified for different vehicle types and road conditions. This finding provides valuable guidance for eco-driving strategies and speed management in sustainable logistics operations.

The main contributions of this work to the field of sustainable logistics include:

1. A comprehensive cyber-physical internet framework that integrates physical logistics operations with digital decision-making systems to enable sustainable, adaptive routing.
2. A novel multi-objective optimization approach that explicitly balances delivery time and carbon emissions, providing logistics operators with flexible control over this fundamental trade-off.
3. A detailed carbon footprint calculation model that accounts for multiple factors affecting emissions, including vehicle characteristics, load factors, road types, and speed-emission relationships.
4. Empirical evidence of the effectiveness of reinforcement learning techniques in adapting to dynamic logistics environments, demonstrating significant improvements in both efficiency and sustainability.
5. Quantification of the time-emission trade-off in logistics operations, providing valuable insights for both operational decision-making and policy development.

Despite these contributions, our work has several limitations that should be acknowledged. The computational complexity of CARO may present challenges for large-scale, real-time applications, and the reinforcement learning component requires significant training data and time to achieve optimal performance. Additionally, our carbon emission calculation model, while comprehensive, still relies on simplifications and assumptions about vehicle performance, traffic conditions, and environmental factors.

Future research should address these limitations and explore several promis-

ing directions. Extending CARO to optimize routes across multiple transportation modes could further enhance its environmental benefits, particularly for long-distance logistics operations. Developing more sophisticated emission models that incorporate additional factors such as vehicle age, maintenance status, driver behavior, and weather conditions could improve the accuracy of carbon footprint calculations. Investigating collaborative routing approaches where multiple logistics providers coordinate through the cyber-physical internet framework could lead to system-wide optimization and greater environmental benefits.

Additionally, exploring the integration of carbon-aware routing with renewable energy systems could create synergies between sustainable transportation and clean energy, potentially routing vehicles to charging stations powered by renewable energy or scheduling deliveries based on renewable energy availability. Developing effective interfaces and interaction models for human-AI collaboration in route planning would allow human operators to leverage the computational capabilities of CARO while contributing their domain expertise and contextual knowledge.

In conclusion, the Carbon-Aware Route Optimization approach presented in this paper represents a significant step toward more sustainable logistics operations. By explicitly addressing the time-emission trade-off and providing flexible tools for balancing these competing objectives, CARO enables logistics operators to reduce their environmental impact while maintaining high service levels. As environmental concerns continue to grow in importance, approaches like CARO that integrate sustainability considerations into core operational decisions will become increasingly valuable for the logistics industry and society as a whole.

## References

- A.A. Ahmed, M.A. Nazzal, and B.M. Darras. Cyber-physical systems as an enabler of circular economy to achieve sustainable development goals: A comprehensive review. *International Journal of Precision Engineering and Manufacturing-Green Technology*, 9:1441–1469, 2022.
- Ã.F. Brochado, E.M. Rocha, and D. Costa. A modular iot-based architecture for logistics service performance assessment and real-time scheduling towards a synchromodal transport system. *Journal*, 2024.
- L. Cai, W. Lv, L. Xiao, and Z. Xu. Total carbon emissions minimization in connected and automated vehicle routing problem with speed variables. *Expert Systems with Applications*, 165:113910, 2021.

- T. Chargui, A. Bekrar, M. Reghioi, and D. Trentesaux. Multi-objective sustainable truck scheduling in a rail-road physical internet cross-docking hub considering energy consumption. *Sustainability*, 11(11):3127, 2019.
- A. Chouar, S. Tetouani, A. Soulhi, and J. Elalami. Data clustering-based metaheuristic for physical internet supply chain network. *Journal of Computer Science*, 18(4):233–245, 2022.
- D.L. Cortes-Murcia, W.J. Guerrero, C. Prodhon, and L.A. Moncayo-Martínez. Supply chain management, game-changing technologies, and physical internet: a systematic meta-review of literature. *IEEE Access*, 10:60264–60283, 2022.
- T.G. Crainic, M. Gendreau, and L. Jemai. Planning hyperconnected, urban logistics systems. *Transportation Research Procedia*, 47:35–42, 2020.
- H.M.A. Ghanimi et al. Optimizing the cyber-physical intelligent transportation system network using enhanced models for data routing and task scheduling. *Journal*, 2025.
- S. Ji, P. Zhao, and T. Ji. A hybrid optimization method for sustainable and flexible design of supply–production–distribution network in the physical internet. *Sustainability*, 15(7):6327, 2023.
- A. Kantasa-Ard, T. Chargui, A. Bekrar, A.A. El Cadi, and Y. Sallez. Dynamic multiple depots vehicle routing in the physical internet context. *IFAC-PapersOnLine*, 54(1):92–97, 2021.
- A. Kermanshah, H. Baroud, and M. Abkowitz. Cyber-physical technologies in freight operations and sustainability: A case study of smart gps technology in trucking. *Sustainable Cities and Society*, 52:101831, 2020.
- N. Lemmens, J. Gijsbrechts, and R. Boute. Synchronomodality in the physical internet – dual sourcing and real-time switching between transport modes. *European Transport Research Review*, 11(1):1–16, 2019.
- Y. Lin, X. Na, D. Wang, and X. Dai. Mobility 5.0: Smart logistics and transportation services in cyber-physical-social systems. *IEEE Transactions on Intelligent Transportation Systems*, 2023.
- Y. Liu, X. Tao, X. Li, and A.W. Colombo. Artificial intelligence in smart logistics cyber-physical systems: State-of-the-arts and potential applications. *IEEE Transactions on Cyber-Physical Systems*, 2023.

- M. Matusiewicz. Physical internet - where are we at? a systematic literature review. *Acta Logistica*, 11(2):299–316, 2024.
- B. Montreuil, R.D. Meller, and E. Ballot. Physical internet foundations. *IFAC Proceedings Volumes*, 14:26–30, 2012.
- C. Ng, M. Li, R.Y. Zhong, X. Qu, and G.Q. Huang. Establishing carbon footprints for modular integrated construction logistics using cyber-physical internet routers. *Transportation Research Part D: Transport and Environment*, 133:104259, 2024.
- S. Pan, D. Trentesaux, D. McFarlane, B. Montreuil, E. Ballot, and G.Q. Huang. Digital interoperability in logistics and supply chain management: state-of-the-art and research avenues towards physical internet. *Computers in Industry*, 128:103435, 2021.
- E. Puskás, Á. Budai, and G. Bohács. Optimization of a physical internet based supply chain using reinforcement learning. *European Transport Research Review*, 12(1):1–16, 2020.
- B. Qiao, S. Pan, and E. Ballot. Revenue optimization for less-than-truckload carriers in the physical internet: dynamic pricing and request selection. *Computers & Industrial Engineering*, 139:106169, 2020.
- U. Rawat and A. Kumar. A cyber-physical system for improving the sustainability of freight logistics industry: A case of developing nation. 2024.
- S. Sharif Azadeh, Y. Maknoon, J.H. Chen, and M. Bierlaire. The impact of collaborative scheduling and routing for interconnected logistics: A european case study. *Greening of Industry Networks Studies*, 8:35–56, 2021.
- Y. Teng and W. Pan. Estimating and minimizing embodied carbon of prefabricated high-rise residential buildings considering parameter, scenario and model uncertainties. *Building and Environment*, 180:106951, 2020.
- H. Tran-Dang and D.S. Kim. The physical internet in the era of digital transformation: Perspectives and open issues. *IEEE Access*, 9:164613–164631, 2021.
- W.J. Van Heeswijk. Strategic bidding in freight transport using deep reinforcement learning. *Annals of Operations Research*, 2022.
- H. Wang, H. Zhang, K. Hou, and G. Yao. Carbon emission analysis of assembled building during prefabricated component transportation phase. *Energy Exploration & Exploitation*, 39(1):385–408, 2021.
